# Supplementary material
Source: PubMed Central journal article supplement (PMC2652886)

SUPPLEMENTARY MATERIAL

*Supplementary Table 1: Definition of the coronary artery disease index (CADI)<sup>21</sup>*

| <b>Extent of CAD</b>                       | <b>CADi</b> |
|--------------------------------------------|-------------|
| No CAD $\geq$ 50%                          | 0           |
| One-VD 50% to 74%                          | 19          |
| One-VD 75%                                 | 23          |
| One-VD $\geq$ 95%                          | 32          |
| Two-VD                                     | 37          |
| Two-VD (both $\geq$ 95%)                   | 42          |
| One-VD $\geq$ 95%, proximal (LAD)          | 48          |
| Two-VD $\geq$ 95% LAD                      | 48          |
| Two-VD $\geq$ 95% proximal LAD             | 56          |
| Three-VD                                   | 56          |
| Three-VD $\geq$ 95% in at least one vessel | 63          |
| Three-VD 75% proximal LAD                  | 67          |
| Three-VD $\geq$ 95% proximal LAD           | 74          |
| Left main (75%)                            | 82          |
| Left main ( $\geq$ 95%)                    | 100         |

CAD =coronary artery disease; LAD=left anterior descending coronary artery; VD=vessel disease.

*Supplementary Table 2. Association tests in the initial dataset*

| SNP        | Chr | NCBI35      | Old Affected |     | Left Main Case |     |
|------------|-----|-------------|--------------|-----|----------------|-----|
|            |     |             | p value      | OR  | p value        | OR  |
| rs9822311  | 3   | 117,021,341 | 0.623        | 1.1 | 0.509          | 1.2 |
| rs3821560  | 3   | 117,054,054 | 0.062        | 0.5 | 0.390          | 0.7 |
| rs11719516 | 3   | 117,067,985 | 0.252        | 0.7 | 0.886          | 1.0 |
| rs10511352 | 3   | 117,125,967 | 0.886        | 1.0 | 0.530          | 0.8 |
| rs9872913  | 3   | 117,183,885 | 0.389        | 1.2 | 0.360          | 1.2 |
| rs1920384  | 3   | 117,250,752 | 0.270        | 1.3 | 0.274          | 1.3 |
| rs9866658  | 3   | 117,331,906 | 0.703        | 1.1 | 0.952          | 1.0 |
| rs7641464  | 3   | 117,368,960 | <b>0.047</b> | 1.5 | 0.112          | 1.4 |
| rs10934326 | 3   | 117,469,033 | 0.130        | 1.6 | <b>0.012</b>   | 2.2 |
| rs1461131  | 3   | 117,483,362 | 0.280        | 1.3 | 0.850          | 1.0 |
| rs9809878  | 3   | 117,515,131 | 0.254        | 0.8 | 0.580          | 0.9 |
| rs2033406  | 3   | 117,547,823 | 0.506        | 0.9 | 0.382          | 1.2 |
| rs9822445  | 3   | 117,644,224 | 0.501        | 1.2 | 0.229          | 1.3 |
| rs10934345 | 3   | 117,692,305 | 0.721        | 1.1 | 0.912          | 1.0 |
| rs9834065  | 3   | 117,730,574 | 0.184        | 1.3 | 0.259          | 1.3 |
| rs1795293  | 3   | 117,761,199 | 0.474        | 1.2 | 0.805          | 1.1 |
| rs1467213  | 3   | 117,805,164 | 0.424        | 1.2 | 0.288          | 1.2 |
| rs9847048  | 3   | 117,838,700 | 0.709        | 1.1 | 0.838          | 0.9 |
| rs10934364 | 3   | 117,896,600 | 0.598        | 1.1 | 0.981          | 1.0 |
| rs1106851  | 3   | 117,943,999 | 0.919        | 1.0 | 0.088          | 0.6 |
| rs1835856  | 3   | 117,974,362 | 0.682        | 0.9 | 0.936          | 1.0 |
| rs6785331  | 3   | 117,990,316 | 0.784        | 1.1 | 0.415          | 0.8 |
| rs7433070  | 3   | 118,042,925 | 0.644        | 0.9 | 0.199          | 0.8 |
| rs6438359  | 3   | 118,071,957 | 0.933        | 1.0 | 0.985          | 1.0 |
| rs2037009  | 3   | 118,110,689 | 0.185        | 0.8 | 0.149          | 0.7 |
| rs1133603  | 3   | 118,133,470 | 0.777        | 0.9 | 0.327          | 1.3 |
| rs1589182  | 3   | 118,186,282 | 0.751        | 0.9 | 0.688          | 0.9 |
| rs1518898  | 3   | 118,211,238 | 0.389        | 1.2 | 0.492          | 0.8 |
| rs4855909  | 3   | 118,212,508 | 0.717        | 1.1 | 0.743          | 0.9 |
| rs938115   | 3   | 118,257,964 | 0.928        | 1.0 | 0.495          | 1.1 |
| rs1850719  | 3   | 118,284,215 | 0.967        | 1.0 | 0.538          | 1.1 |
| rs7633227  | 3   | 118,313,302 | 0.357        | 1.2 | 0.818          | 1.1 |
| rs733527   | 3   | 118,347,424 | 0.306        | 1.2 | 0.822          | 1.0 |
| rs6788787  | 3   | 118,353,538 | 0.767        | 1.1 | 0.745          | 1.1 |
| rs1915585  | 3   | 118,391,522 | 0.432        | 0.8 | 0.396          | 0.8 |
| rs1462845  | 3   | 118,425,700 | 0.619        | 0.9 | 0.136          | 0.7 |
| rs4855900  | 3   | 118,477,957 | 0.331        | 0.8 | 0.247          | 0.7 |
| rs1513172  | 3   | 118,494,578 | 0.700        | 1.1 | 0.092          | 1.4 |
| rs6438389  | 3   | 118,532,507 | 0.548        | 0.9 | 0.788          | 0.9 |
| rs1513156  | 3   | 118,549,311 | 0.345        | 0.8 | 0.254          | 0.7 |
| rs11716267 | 3   | 118,586,537 | 0.603        | 1.1 | 0.312          | 1.3 |
| rs1398626  | 3   | 118,616,293 | 0.178        | 1.3 | 0.544          | 1.1 |
| rs1513162  | 3   | 118,617,776 | 0.519        | 1.1 | 0.669          | 1.1 |
| rs4075039  | 3   | 118,645,474 | 0.361        | 0.8 | 0.057          | 0.5 |
| rs7427839  | 3   | 118,648,013 | 0.218        | 1.3 | 0.245          | 1.3 |
| rs6790819  | 3   | 118,659,480 | 0.073        | 7.6 | 0.098          | 6.8 |
| rs4356827  | 3   | 118,661,434 | 0.284        | 0.8 | 0.314          | 0.8 |
| rs2927275  | 3   | 118,666,759 | 0.421        | 0.8 | 0.851          | 1.0 |
| rs1698042  | 3   | 118,667,838 | 0.110        | 0.5 | 0.433          | 0.7 |
| rs1910040  | 3   | 118,673,682 | 0.203        | 0.7 | 0.100          | 0.7 |

|            |   |             |              |     |              |     |
|------------|---|-------------|--------------|-----|--------------|-----|
| rs11713954 | 3 | 118,699,690 | 0.580        | 0.8 | 0.117        | 0.5 |
| ss70458782 | 3 | 118,709,990 | 0.062        | 0.6 | 0.091        | 0.6 |
| rs1875518  | 3 | 118,712,470 | 0.079        | 1.4 | <b>0.008</b> | 1.8 |
| rs1676232  | 3 | 118,717,529 | <b>0.044</b> | 0.7 | <b>0.022</b> | 0.6 |
| rs4855952  | 3 | 118,717,715 | 0.506        | 1.5 | 0.410        | 1.6 |
| rs1501874  | 3 | 118,720,007 | 0.501        | 0.8 | 0.426        | 0.7 |
| rs2937670  | 3 | 118,720,251 | 0.844        | 1.1 | 0.122        | 0.6 |
| rs1979868  | 3 | 118,722,031 | 0.744        | 1.1 | 0.760        | 1.1 |
| rs1381801  | 3 | 118,723,585 | 0.750        | 0.9 | 0.929        | 1.0 |
| rs2937666  | 3 | 118,729,388 | 0.231        | 1.3 | 0.910        | 1.0 |
| rs1910044  | 3 | 118,733,409 | 0.504        | 1.2 | 0.917        | 1.0 |
| rs4855955  | 3 | 118,738,784 | 0.434        | 0.8 | 0.399        | 0.8 |
| rs6778437  | 3 | 118,746,628 | 0.552        | 2.3 | 0.534        | 2.4 |
| rs6795971  | 3 | 118,751,683 | 0.552        | 2.3 | 0.534        | 2.4 |
| rs1393192  | 3 | 118,752,560 | 0.418        | 0.8 | 0.581        | 0.9 |
| rs1466416  | 3 | 118,753,496 | 0.979        | 0.0 | 0.175        | 0.2 |
| rs2869787  | 3 | 118,791,508 | 0.645        | 1.1 | 0.738        | 1.1 |
| rs869851   | 3 | 118,804,008 | 0.998        | 1.0 | 0.707        | 1.1 |
| rs2904196  | 3 | 118,829,308 | 0.524        | 0.9 | 0.968        | 1.0 |
| rs6774738  | 3 | 118,849,617 | 0.291        | 0.8 | 0.165        | 0.7 |
| rs4234669  | 3 | 118,851,827 | 0.583        | 0.9 | 0.448        | 0.9 |
| rs4290831  | 3 | 118,856,228 | 0.447        | 0.7 | 0.731        | 0.9 |
| rs4404477  | 3 | 118,857,458 | 0.206        | 0.7 | 0.106        | 0.6 |
| rs9877923  | 3 | 118,862,230 | 0.635        | 1.1 | 0.522        | 1.2 |
| rs4440150  | 3 | 118,863,334 | 0.843        | 1.0 | 0.635        | 1.1 |
| rs6784348  | 3 | 118,892,675 | 0.499        | 0.9 | 0.719        | 0.9 |
| rs7646668  | 3 | 118,914,350 | 0.075        | 1.4 | 0.290        | 1.2 |
| rs6438404  | 3 | 118,918,128 | 0.449        | 0.8 | 0.634        | 0.9 |
| rs4367097  | 3 | 118,922,408 | 0.207        | 0.4 | 0.255        | 0.5 |
| rs9861188  | 3 | 118,932,645 | <b>0.023</b> | 1.6 | 0.111        | 1.4 |
| rs7647501  | 3 | 118,939,388 | 0.212        | 0.8 | 0.556        | 0.9 |
| rs4687991  | 3 | 118,947,921 | 0.246        | 0.8 | 0.339        | 0.8 |
| rs4687996  | 3 | 118,956,667 | 0.186        | 0.8 | 0.356        | 0.8 |
| rs6796552  | 3 | 118,967,152 | 0.281        | 0.8 | 0.378        | 0.8 |
| rs4687889  | 3 | 119,020,129 | 0.295        | 1.2 | 0.586        | 1.1 |
| rs7427162  | 3 | 119,069,371 | 0.191        | 1.3 | 0.285        | 1.3 |
| rs1378834  | 3 | 119,102,092 | 0.149        | 0.5 | 0.575        | 0.8 |
| rs1456186  | 3 | 119,110,095 | 0.763        | 0.9 | 0.715        | 1.1 |
| rs817508   | 3 | 119,168,266 | 0.978        | 1.0 | 0.571        | 1.2 |
| rs17723301 | 3 | 119,198,278 | 0.452        | 1.2 | 0.569        | 1.1 |

Logistic regression analyses were performed adjusting for gender using genotype case-control statistics provided by SAS 9.0. *OR*=odds ratio estimates. P-values less than 0.05 are shown in bold.

***Supplementary Figure Legend***

**Supplementary Figure 1. Pairwise linkage disequilibrium analysis between SNPs.** Pairwise  $r^2$  was estimated in controls using the GOLD program and is displayed by HaploView.

**Supplementary Figure 2. LSAMP is expressed in human aortic SMCs but not endothelial cells.**

Total RNAs extracted from human aortic endothelial and SMCs were subjected to semi-quantitative RT-PCR. PCR cycle numbers used were as following: *LSAMP\_1a* (35 cycles), *LSAMP\_1b* (35 cycles), and *GAPDH* (25 cycles). PCR products and Low Mass DNA Ladder from Invitrogen were electrophoresised on 2.5% agarose gel.

Supplementary Figure 1

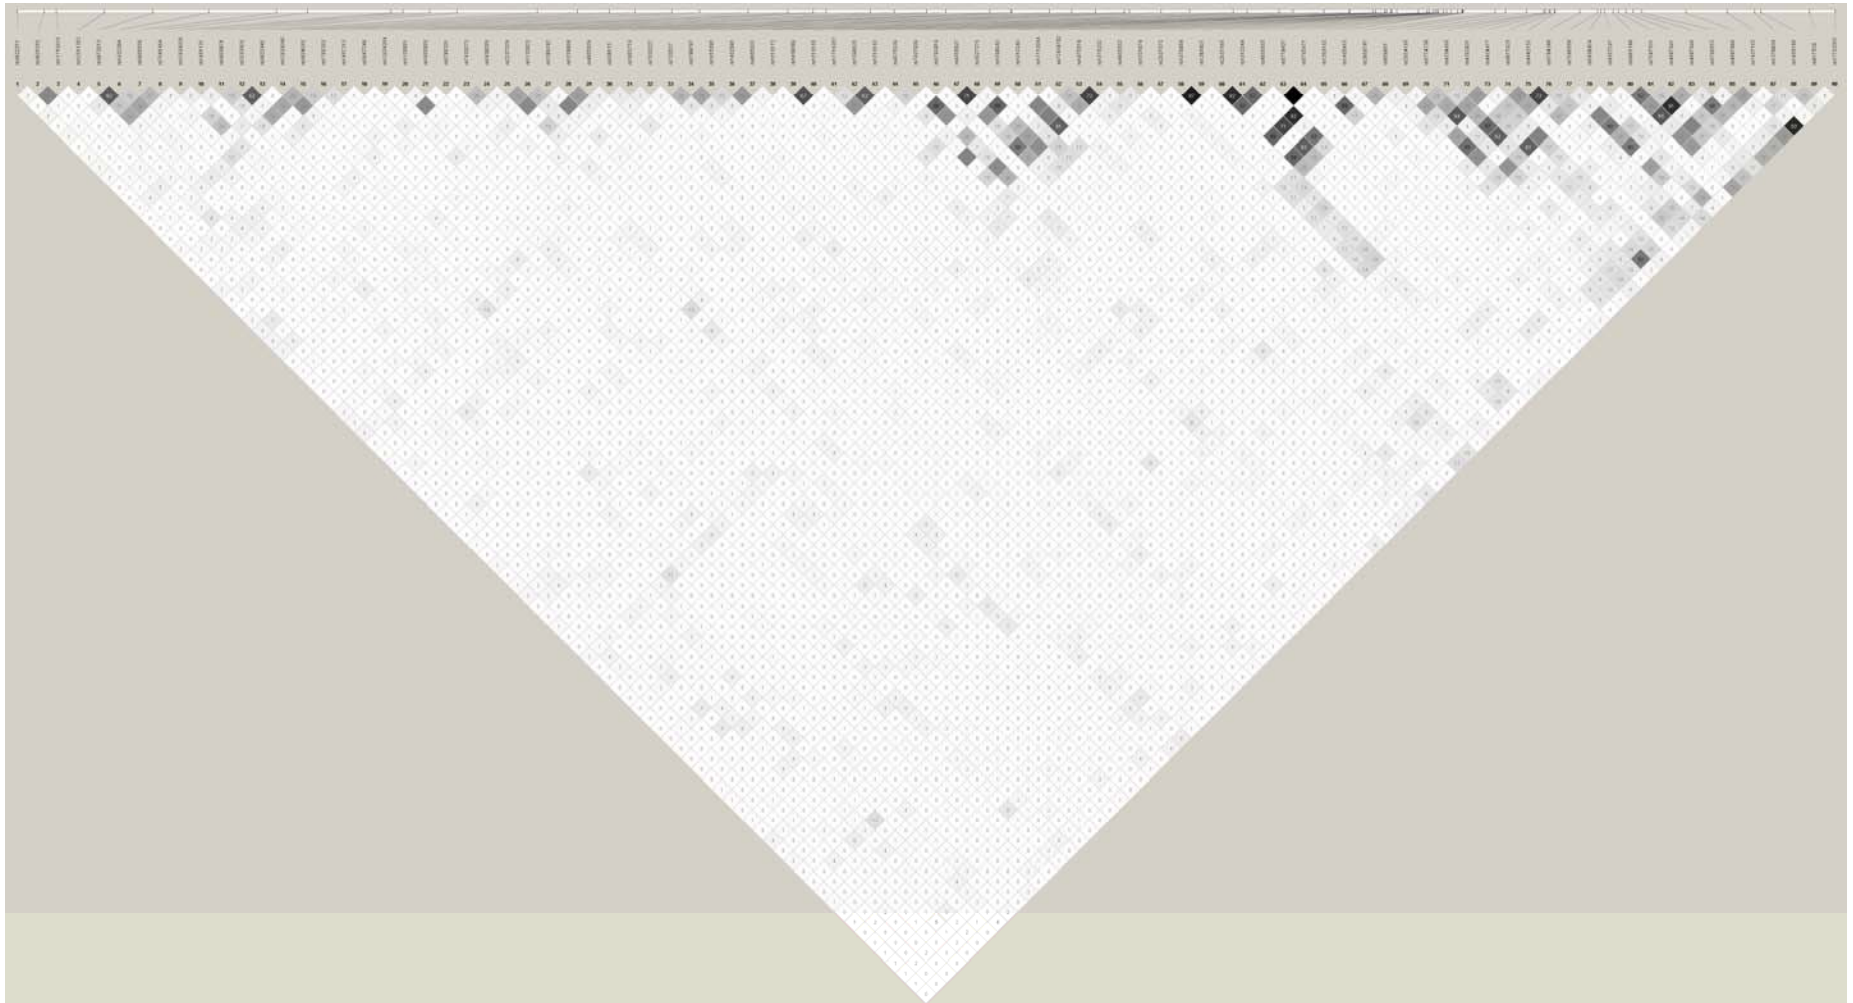

Supplementary Figure 2.

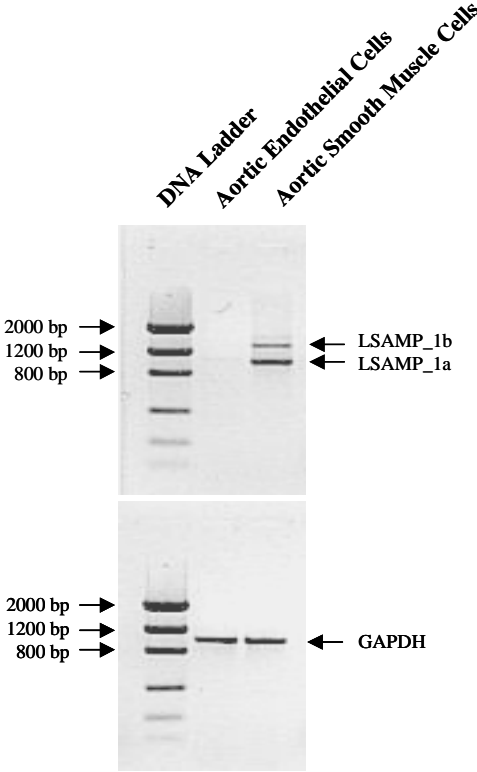

Supplement: NIHMS90865-supplement-2.pdf [file NIHMS90865-supplement-2.pdf]
